# Supplementary material for: Conservation implications of primate trade in China over 18 years based on web news reports of confiscations
Source: PeerJ. 2018 Dec 6;6:e6069. doi: 10.7717/peerj.6069 (PMC6286804; doi:10.7717/peerj.6069)
Supplement: Supplemental Information 1 [file peerj-06-6069-s001.csv]

App.	Taxon	Term	Unit	Country	1975	1976	1977	1978	1979	1980	1981	1982	1983	1984	1985	1986	1987	1988	1989	1990	1991	1992	1993	1994	1995	1996	1997	1998	1999	2000	2001	2002	2003	2004	2005	2006	2007	2008	2009	2010	2011	2012	2013	2014	2015	2016	2017
I	Cheirogaleus medius	live		CN																																				1
I	Hylobates lar	live		CN																	2
I	Lemur catta	live		CN																																				2
I	Macaca silenus	live		CN												1
I	Nomascus concolor	live		CN																												1
I	Nomascus leucogenys	live		CN																											1	1
I	Nycticebus bengalensis	live		CN																																				1	2					5
I	Nycticebus pygmaeus	live		CN																																					1
I	Pan troglodytes	live		CN												3	1	2			3			2			1	1
I	Pongo pygmaeus	live		CN																							3
I	Rhinopithecus roxellana	live		CN											6	10	17	9	2		2	2	4	3	4	3		1	4	4							4
II	Callithrix jacchus	live		CN																								3
II	Lophocebus aterrimus	live		CN																																								2
II	Macaca arctoides	live		CN												2		2				10	20	21	42							6												540	180	240
II	Macaca assamensis	live		CN																											2	2
II	Macaca fascicularis	live		CN												45	70		130	93	86	895	1338	1338	3570	4001	4302	4839	6163	8399	8513	10938	8365	12893	17491	19315	24285	25252	24578	23517	16979	12710	15045	25996	19306	22342
II	Macaca fuscata	live		CN												6							2		1																			360
II	Macaca mulatta	live	ml	CN																																			120
II	Macaca mulatta	live		CN						60	96	127	90	117	111	806	1493	2286	1296	1560	1216	1111	1633	1774	3190	1593	1827	1539	2557	3437	2986	3950	3362	2055	2077	2352	2152	1593	2788	2512	2780	2503	2097	2870	1869	2826
II	Macaca nemestrina	live		CN																												8	6	8					9				1	4		7
II	Macaca nigra	live		CN																												1
II	Macaca spp.	live		CN													12						120
II	Macaca sylvanus	live		CN																												1
II	Macaca thibetana	live		CN								2						6	4				2
II	Mandrillus sphinx	live		CN						2
II	Nycticebus coucang	live		CN												2	2	2						14	14
II	Papio cynocephalus	live		CN																												2
II	Papio hamadryas	live		CN																											1	3												2
II	Papio papio	live		CN																												1
II	Presbytis thomasi	live		CN												200
II	Primates spp.	live		CN							93	196
II	Rhinopithecus roxellana	live		CN					2					4	3
II	Saguinus oedipus	live		CN																								3
II	Saimiri sciureus	live		CN																									4													5
II	Saimiri spp.	live		CN																											40
II	Theropithecus gelada	live		CN																											4	2
II	Trachypithecus francoisi	live		CN							8	9	8		6	3	6	13		7		4	2	3	4	11	5		1	2								2	6	2
