# Supplementary material for: Conservation implications of primate trade in China over 18 years based on web news reports of confiscations
Source: PeerJ. 2018 Dec 6;6:e6069. doi: 10.7717/peerj.6069 (PMC6286804; doi:10.7717/peerj.6069)
Supplement: Supplemental Information 3 [file peerj-06-6069-s003.xlsx]

## Sheet: Sheet1
Date	Species	Number of individuals	Province	Correct or not	Location category	PC Category	PR Category	Resource category	Handling Category	Whereabouts category
2017-02-01	Hoolock tianxing	1	Yunnan		Market	Unknown	Primates			Unknown
2016-06-01	Hylobates lar	2	Yunnan		Residential area	Healthy	Primates			Unknown
2009-09-01	M. arctoides	1	Jiangxi		Residential area	1 Subhealthy	Primates	Distribution area	Rescue	Unknown
2011-10-01	M. arctoides	1	Hunan		Residential area	1 Injured	Primates	Distribution area	Rescue	Wildlife rescue center
2012-03-01	M. arctoides	1	Hunan		Residential area	1 Injured	Primates	Unknown	Release	Wildlife rescue center
2012-12-01	M. arctoides	1	Anhui		Residential area	1 Healthy	Primates	Distribution area	Rescue	Wild
2015-12-01	M. arctoides	1	Anhui		Field	1 Healthy	Primates	Unknown	Release	Wildlife rescue center
2015-12-01	M. arctoides	1	Yunnan		Residential area	1 Healthy	Primates	Unknown	Release	Wildlife rescue center
2016-02-01	M. arctoides	1	Anhui		Field	1 Injured	Primates	Distribution area	Rescue	Unknown
2016-09-01	M. arctoides	1	Anhui		Residential area	1 Healthy	Primates	Unknown	Rescue	Zoo
2017-04-01	M. arctoides	1	Yunnan		Residential area	1 Healthy	Primates	Distribution area	Rescue	Wild
2017-08-01	M. arctoides	2	Hunan		Vehicle	1 Injured	Primates	Trade	Rescue	Wild
2017-09-01	M. arctoides	1	Yunnan		Residential area	Healthy	Primates			Wildlife rescue center
2017-11-01	M. arctoides	1	Yunnan		Residential area	Healthy	Primates			Unknown
2008-09-01	M. assamensis	1	Yunnan		Field	1 Healthy	Primates	Unknown	Rescue	Zoo
2013-03-01	M. assamensis	1	Zhejiang		Residential area	1 Healthy	Primates	Unknown	Rescue	Zoo
2016-03-01	M. assamensis	1	Yunnan		Residential area	1 Healthy	Species	pet	Private captivity	Wildlife rescue center
2016-07-01	M. assamensis	1	Hunan		Residential area	1 Healthy	Primates	pet	Rescue	Unknown
2017-04-01	M. assamensis	1	Yunnan		Residential area	1 Healthy	Primates	Distribution area	Rescue	Wild
2017-05-01	M. assamensis	1	Yunnan		Field	1 Injured	Primates	Distribution area	Release	Wildlife rescue center
2017-08-01	M. assamensis	1	Yunnan		Residential area	1 Healthy	Primates	Distribution area	Rescue	Wild
2017-08-01	M. assamensis	1	Yunnan		Residential area	1 Healthy	Primates	Distribution area	Rescue	Wildlife rescue center
2012-08-01	M. cyclopis	1	Taiwan		Residential area	1 Injured	Species	Unknown	Rescue	Wild
2012-12-01	M. cyclopis	1	Chongqing		Residential area	1 Injured	Species	Unknown	Rescue	Unknown
2013-01-01	M. cyclopis	1	Taiwan		Residential area	1 Dead	Species	Distribution area	Unknown	Unknown
2014-06-01	M. cyclopis	3	Taiwan		Residential area	1 Dead，2 Subhealthy	Species	Distribution area	Rescue	Unknown			2
2017-08-01	M. cyclopis	1	Taiwan		Residential area	1 Injured	Species		Rescue	Unknown
2005-07-01	M. mulatta	1	Beijing		Residential area	1 Healthy	Primates	pet	Rescue	Zoo
2007-06-01	M. mulatta	2	Jiangxi		Field	2 Injured	Primates	Trade	Rescue	Unknown
2010-09-01	M. mulatta	17	Shanxi		Residential area	17 Subhealthy	Primates	Trade	Unknown	Unknown
2011-08-01	M. mulatta	1	Yunnan		Vehicle	1 Injured	Primates	Trade	Rescue	Wild
2012-08-01	M. mulatta	25	Hebei		Vehicle	24 Healthy，1 Subhealthy	Primates	Trade	Rescue	Unknown
2012-09-01	M. mulatta	1	Beijing		Residential area	1 Subhealthy	Primates	pet	Rescue	Wild
2012-12-01	M. mulatta	1	Chongqing		Field	1 Injured	Primates	Distribution area	Rescue	Wildlife rescue center
2013-09-01	M. mulatta	1	Fujian		Field	1 Injured	Primates	Distribution area	Rescue	Wildlife rescue center
2014-01-01	M. mulatta	2	Guizhou		Residential area	2 Healthy	Primates	Distribution area	Rescue	Wildlife rescue center
2014-01-01	M. mulatta	1	Hebei		Residential area	1 Healthy	Primates	Distribution area	Rescue	Wild
2014-02-01	M. mulatta	18	Hebei		Vehicle	15 Subhealthy，3 Dead	Primates	Trade	Rescue	Zoo
2014-08-01	M. mulatta	1	Guizhou		Field	1 Injured	Primates	Distribution area	Rescue	Wild
2014-10-01	M. mulatta	1	Jiangxi		Field	1 Injured	Primates	Distribution area	Rescue	Zoo
2014-12-01	M. mulatta	1	Sichuan		Market	1 Injured	Primates	Trade	Rescue	Wild
2015-03-01	M. mulatta	2	Guizhou		Residential area	2 Subhealthy	Primates	Distribution area	Rescue	Wild
2015-04-01	M. mulatta	1	Guizhou		Field	1 Injured	Species	Trade	Private captivity	Wildlife rescue center
2015-05-01	M. mulatta	1	Henan		Vehicle	1 Subhealthy	Primates	Trade	Rescue	Wild
2015-07-01	M. mulatta	7	Liaoning		Market	6 Healthy，1 Dead	Primates	Trade	Rescue	Unknown
2015-11-01	M. mulatta	12	Sichuan		Vehicle	12 Healthy	Primates	Trade	Rescue	Unknown
2015-12-01	M. mulatta	7	Hubei		Vehicle	7 Subhealthy	Species	Trade	Rescue	Unknown
2016-03-01	M. mulatta	7	Hubei		Vehicle	7 Healthy	Species	Trade	Rescue	Unknown
2016-03-01	M. mulatta	2	Jiangsu		Residential area	2 Subhealthy	Primates	Unknown	Rescue	Unknown
2016-03-01	M. mulatta	2	Zhejiang		Residential area	2 Subhealthy	Primates	Trade	Rescue	Wild
2016-09-01	M. mulatta	1	Henan		Residential area	1 Healthy	Primates	pet	Rescue	Wild
2016-09-01	M. mulatta	1	Jiangxi		Residential area	1 Healthy	Primates	Distribution area	Release	Wildlife rescue center
2016-09-01	M. mulatta	1	Yunnan		Field	1 Healthy	Primates	Distribution area	Private captivity	Wildlife rescue center
2016-11-01	M. mulatta	2	Shan'xi		Vehicle	2 Healthy	Species	Trade	Rescue	Unknown
2016-12-01	M. mulatta	1	Hubei		Field	1 Injured	Unknown	Distribution area	Rescue	Wild
2016-12-01	M. mulatta	1	Jiangsu		Residential area	1 Subhealthy	Primates	pet	Rescue	Zoo
2016-12-01	M. mulatta	1	Shan'xi		Field	1 Injured	Species	Distribution area	Rescue	Wild
2017-02-01	M. mulatta	1	Hunan		Residential area	1 Healthy	Primates	Unknown	Rescue	Wildlife rescue center
2017-03-01	M. mulatta	1	Hubei		Residential area	1 Healthy	Species	Distribution area	Rescue	Unknown
2017-03-01	M. mulatta	1	Neimenggu		Residential area	1 Healthy	Primates	Trade	Rescue	Unknown
2017-03-01	M. mulatta	1	Yunnan		Field	1 Injured	Primates	Distribution area	Private captivity	Wildlife rescue center
2017-04-01	M. mulatta	1	Fujian		Residential area	1 Healthy	Primates	Unknown	Private captivity	Wild
2017-04-01	M. mulatta	2	Hainan		Residential area	2 Subhealthy	Primates	Unknown	Rescue	Wild
2017-04-01	M. mulatta	1	Sichuan		Field	1 Injured	Primates	Distribution area	Private captivity	Unknown
2017-04-01	M. mulatta	1	Yunnan		Market	1 Subhealthy	Primates	Trade	Rescue	Wild
2017-04-01	M. mulatta	1	Yunnan		Field	1 Injured	Primates	Distribution area	Private captivity	Wild
2017-05-01	M. mulatta	1	Yunnan		Residential area	1 Healthy	Primates	Distribution area	Rescue	Wild
2017-06-01	M. mulatta	1	Hunan		Residential area	1 Healthy	Primates	pet	Rescue	Unknown
2017-06-01	M. mulatta	1	Yunnan		Residential area	1 Healthy	Primates	Trade	Rescue	Unknown
2017-07-01	M. mulatta	11	Sichuan		Residential area	11 Subhealthy	Primates	Trade	Rescue	Unknown
2017-08-01	M. mulatta	2	Guangxi		Vehicle	2 Healthy	Primates	Unknown	Rescue	Unknown
2017-08-01	M. mulatta	1	Guangxi		Residential area	1 Healthy	Primates	Unknown	Release	Wildlife rescue center
2017-08-01	M. mulatta	1	Henan		Residential area	1 Healthy	Primates	Unknown	Rescue	Wild
2017-08-01	M. mulatta	1	Hunan		Residential area	1 Injured	Primates	Distribution area	Rescue	Wild
2017-08-01	M. mulatta	2	Yunnan		Field	2 Injured	Primates	Distribution area	Rescue	Unknown
2017-09-01	M. mulatta	1	Jiangxi		Residential area	1 Injured	Species	Unknown	Rescue	Wild
2017-09-01	M. mulatta	1	Yunnan		Residential area	1 Healthy	Species	pet	Rescue	Unknown
2017-09-01	M. mulatta	1	Yunnan		Vehicle	1 Subhealthy	Primates	Trade	Rescue	Wild
2017-10-01	M. mulatta	2	Shanghai		Field	2 Healthy	Species	pet	Rescue	Unknown
2017-10-01	M. mulatta	1	Yunnan		Field	1 Subhealthy	Primates	pet	Rescue	Wild
2017-11-01	M. mulatta	3	Hainan		Market	3 Healthy	Primates	Trade	Rescue	Unknown
2017-11-01	M. mulatta	1	Sichuan		Field	1 Injured	Primates	pet	Rescue	Unknown
2017-11-01	M. mulatta	1	Yunnan		Residential area	1 Healthy	Primates	pet	Rescue	Unknown
2017-11-01	M. mulatta	1	Chongqing		Residential area	1 Injured	Primates	Distribution area	Rescue	Unknown
2011-08-01	M. thibetana	1	Sichuan		Residential area	2 Healthy	Primates	Distribution area	Rescue	Zoo
2012-04-01	M. thibetana	1	Sichuan		Residential area	1 Healthy	Primates	Distribution area	Rescue	Wildlife rescue center
2012-08-01	M. thibetana	1	Zhejiang		Field	3 Injured	Unknown	Distribution area	Release	Wildlife rescue center
2012-09-01	M. thibetana	1	Hubei		Residential area	2 Healthy	Primates	Distribution area	Release	Wildlife rescue center
2013-11-01	M. thibetana	1	Jiangxi		Residential area	1 Healthy	Primates	Unknown	Release	Wildlife rescue center
2014-09-01	M. thibetana	1	Hunan		Residential area	1 Healthy	Unknown	Unknown	Rescue	Wildlife rescue center
2015-03-01	M. thibetana	1	Sichuan		Field	3 Injured	Primates	Distribution area	Rescue	Wildlife rescue center
2015-05-01	M. thibetana	1	Sichuan		Residential area	2	Primates	Unknown	Rescue	Zoo
2015-06-01	M. thibetana	1	Guizhou		Field	1 Healthy	Primates	Distribution area	Release	Wildlife rescue center
2016-03-01	M. thibetana	1	Sichuan		Residential area	3 Injured	Primates	Unknown	Rescue	Wild
2016-05-01	M. thibetana	1	Sichuan		Field	3 Injured	Primates	Unknown	Rescue	Wild
2017-05-01	M. thibetana	3	Guangdong		Market	3 Injured	Primates	Trade	Rescue	Wild
2017-06-01	M. thibetana	1	Zhejiang		Field	3	Primates	Unknown	Rescue	Zoo
2017-11-02	M. thibetana	1	Sichuan		Field	Injured	Primates	Distribution area	Rescue	Unknown
2015-03-01	Macaca leonina	5	Heilongjiang		Market	1 Healthy	Primates
2017-08-01	Macaca leonina	1	Yunnan		Field	Healthy	Primates			Unknown
2001-03-01	N. pygmaeus	9	Guangdong	Correct	Field	9 Healthy	Species	Trade	Rescue	Wild
2002-04-01	N. pygmaeus	15	Hongkong	Correct	Residential area	15 Healthy	Species	Trade	Rescue	Zoo
2002-12-01	N. pygmaeus	2	Beijing	Correct	Vehicle	2 Healthy	Species	Trade	Unknown	Zoo
2003-01-01	N. pygmaeus	1	Chongqing	Correct	Residential area	1 Healthy	Primates	Trade	Unknown	Wild
2003-02-01	N. pygmaeus	2	Liaoning	Incorrect	Residential area	2 Subhealthy	Unknown	Trade	Unknown	Wildlife rescue center
2003-04-01	N. pygmaeus	2	Guangdong	Incorrect	Vehicle	2 Subhealthy	Species	Trade	Unknown	Unknown
2003-06-01	N. pygmaeus	2	Yunnan	Incorrect	Residential area	1 Subhealthy，1 Dead	Species	Trade	Unknown	Wildlife rescue center
2003-12-01	N. pygmaeus	2	Liaoning	Correct	Market	2 Subhealthy	Primates	Trade	Rescue	Wildlife rescue center
2004-05-01	N. pygmaeus	9	Henan	Correct	Vehicle	9 Subhealthy	Species	Trade	Rescue	Zoo
2004-08-01	N. pygmaeus	1	Beijing	Incorrect	Residential area	1 Healthy	Species	Unknown	Unknown	Zoo
2005-10-01	N. pygmaeus	1	Hunan	Incorrect	Vehicle	1 Healthy	Unknown	Trade	Release	Wildlife rescue center
2006-03-01	N. pygmaeus	1	Sichuan	Correct	Residential area	1 Subhealthy	Species	Trade	Rescue	Unknown
2007-02-01	N. pygmaeus	1	Yunnan	Incorrect	Field	1 Subhealthy	Species	Distribution area	Rescue	Wild
2007-03-01	N. pygmaeus	1	Guangdong	Incorrect	Residential area	1 Subhealthy	Primates	Trade	Rescue	Wildlife rescue center
2007-05-01	N. pygmaeus	1	Fujian	Correct	Field	1 Healthy	Primates	Trade	Rescue	Zoo
2007-05-01	N. pygmaeus	1	Yunnan	Incorrect	Residential area	1 Subhealthy	Unknown	Unknown	Rescue	Zoo
2007-06-01	N. pygmaeus	1	Yunnan	Correct	Residential area	1 Healthy	Unknown	Trade	Rescue	Zoo
2007-11-01	N. pygmaeus	1	Chongqing	Correct	Residential area	1 Injured	Unknown	Trade	Rescue	Zoo
2008-06-01	N. pygmaeus	1	Yunnan	Correct	Residential area	1 Subhealthy	Species	pet	Release	Wildlife rescue center
2009-02-01	N. pygmaeus	8	Yunnan	Incorrect	Residential area	8 Subhealthy	Unknown	Unknown	Rescue	Zoo
2009-04-01	N. pygmaeus	1	Guangdong	Incorrect	Residential area	1 Subhealthy	Species	Trade	Rescue	Zoo
2009-04-01	N. pygmaeus	4	Yunnan	Incorrect	Vehicle	4 Subhealthy	Unknown	Trade	Unknown	Unknown
2009-04-01	N. pygmaeus	1	Yunnan	Correct	Market	1 Subhealthy	Species	Trade	Release	Wildlife rescue center
2009-05-01	N. pygmaeus	1	Fujian	Correct	Residential area	1 Subhealthy	Unknown	Trade	Rescue	Zoo
2009-05-01	N. pygmaeus	2	Fujian	Correct	Residential area	1 Subhealthy，1 Dead	Species	Unknown	Rescue	Zoo
2009-05-01	N. pygmaeus	1	Yunnan	Correct	Market	1 Subhealthy	Species	Trade	Rescue	Zoo
2009-06-01	N. pygmaeus	1	Guangdong	Correct	Residential area	1 Healthy	Unknown	Trade	Rescue	Unknown
2009-07-01	N. pygmaeus	1	Shan'xi	Correct	Market	1 Subhealthy	Species	Trade	Rescue	Zoo
2009-08-01	N. pygmaeus	1	Yunnan	Correct	Residential area	1 Subhealthy	Species	Trade	Rescue	Zoo
2009-08-01	N. pygmaeus	1	Yunnan	Correct	Residential area	1 Subhealthy	Species	Unknown	Release	Wild
2009-08-01	N. pygmaeus	1	Zhejiang	Correct	Residential area	1 Injured	Unknown	Unknown	Rescue	Zoo
2010-06-01	N. pygmaeus	8	Guangxi	Incorrect	Vehicle	5 Subhealthy，3 Dead	Species	Unknown	Rescue	Wildlife rescue center
2010-07-01	N. pygmaeus	1	Guangdong	Correct	Field	1 Injured	Primates	Unknown	Unknown	Zoo
2010-07-01	N. pygmaeus	1	Hebei	Correct	Residential area	1 Healthy	Unknown	Trade	Rescue	Wildlife rescue center
2010-07-01	N. pygmaeus	1	Zhejiang	Correct	Residential area	1 Healthy	Primates	pet	Unknown	Zoo			2
2010-10-01	N. pygmaeus	4	Henan	Correct	Market	6 Subhealthy，5 Dead	Primates	Trade	Rescue	Wild
2010-12-01	N. pygmaeus	1	Shandong	Incorrect	Residential area	1 Subhealthy	Species	Trade	Rescue	Wildlife rescue center
2011-04-01	N. pygmaeus	2	Yunnan	Correct	Residential area	1 Injured，1 Dead	Species	Trade	Release	Wild
2011-06-01	N. pygmaeus	1	Guangdong	Incorrect	Residential area	1 Subhealthy	Unknown	Trade	Rescue	Wildlife rescue center
2011-09-01	N. pygmaeus	1	Beijing	Incorrect	Residential area	1 Subhealthy	Primates	pet	Rescue	Unknown
2012-04-01	N. pygmaeus	1	Chongqing	Correct	Residential area	1 Healthy	Primates	Trade	Rescue	Zoo
2012-07-01	N. pygmaeus	1	Yunnan	Incorrect	Residential area	1 Subhealthy	Species	Unknown	Rescue	Wildlife rescue center
2012-08-01	N. pygmaeus	1	Jilin	Incorrect	Residential area	1 Healthy	Primates	Unknown	Unknown	Zoo
2012-10-01	N. pygmaeus	1	Shanghai	Correct	Residential area	1 Healthy	Unknown	Unknown	Rescue	Zoo
2012-11-01	N. pygmaeus	1	Shanxi	Correct	Residential area	1 Subhealthy	Unknown	Unknown	Unknown	Zoo
2012-12-01	N. pygmaeus	1	Yunnan	Incorrect	Residential area	1 Subhealthy	Species	Unknown	Unknown	Unknown
2013-03-01	N. pygmaeus	1	Yunnan	Correct	Residential area	1 Subhealthy	Species	pet	Rescue	Wild
2013-05-01	N. pygmaeus	1	Tianjin	Correct	Residential area	1 Subhealthy	Species	pet	Rescue	Wild
2013-05-01	N. pygmaeus	1	Yunnan	Correct	Residential area	1 Subhealthy	Primates	Unknown	Unknown	Zoo
2013-06-01	N. pygmaeus	7	Beijing	Correct	Market	7 Healthy	Species	pet	Rescue	Unknown
2013-06-01	N. pygmaeus	1	Henan	Correct	Residential area	1 Subhealthy	Unknown	Unknown	Rescue	Zoo
2013-06-01	N. pygmaeus	1	Shandong	Correct	Residential area	1 Subhealthy	Primates	pet	Rescue	Zoo
2013-06-01	N. pygmaeus	1	Zhejiang	Correct	Residential area	1 Subhealthy	Primates	Trade	Rescue	Wildlife rescue center
2013-06-01	N. pygmaeus	3	Zhejiang	Correct	Market	3 Subhealthy	Species	Unknown	Rescue	Wildlife rescue center
2013-10-01	N. pygmaeus	10	Guangxi	Incorrect	Vehicle	10 Subhealthy	Unknown	Trade	Rescue	Wildlife rescue center
2013-10-01	N. pygmaeus	1	Yunnan	Incorrect	Residential area	1 Injured	Unknown	Unknown	Rescue	Zoo
2014-03-01	N. pygmaeus	1	Guangdong	Correct	Residential area	1 Injured	Unknown	Unknown	Rescue	Wildlife rescue center
2014-05-01	N. pygmaeus	3	Yunnan	Incorrect	Vehicle	3 Subhealthy	Species	Unknown	Unknown	Unknown
2014-07-01	N. pygmaeus	1	Anhui	Incorrect	Residential area	1 Subhealthy	Primates	Trade	Rescue	Zoo
2014-08-01	N. pygmaeus	1	Jiangxi	Incorrect	Residential area	1 Injured	Unknown	Unknown	Rescue	Zoo
2014-09-01	N. pygmaeus	1	Henan	Incorrect	Residential area	1 Subhealthy	Unknown	Trade	Unknown	Unknown
2014-12-01	N. pygmaeus	1	Yunnan	Incorrect	Residential area	1 Injured	Unknown	Unknown	Rescue	Wild
2015-03-01	N. pygmaeus	1	Yunnan	Correct	Vehicle	1 Subhealthy	Species	Unknown	Rescue	Wildlife rescue center
2015-09-01	N. pygmaeus	1	Shandong	Incorrect	Residential area	1 Subhealthy	Primates	pet	Unknown	Unknown
2015-12-01	N. pygmaeus	1	Beijing	Correct	Residential area	1 Injured	Unknown	Unknown	Rescue	Unknown
2016-01-01	N. pygmaeus	2	Yunnan	Correct	Residential area	2 Subhealthy	Unknown	Trade	Rescue	Zoo
2016-05-01	N. pygmaeus	1	Guizhou	Correct	Residential area	1 Subhealthy	Unknown	Unknown	Rescue	Zoo
2016-05-01	N. pygmaeus	1	Yunnan	Correct	Field	1 Injured	Unknown	Trade	Rescue	Unknown
2016-06-01	N. pygmaeus	1	Guangdong	Correct	Residential area	1 Subhealthy	Unknown	Unknown	Rescue	Wild
2016-06-01	N. pygmaeus	1	Yunnan	Correct	Market	1 Healthy	Species	Trade	Release	Wildlife rescue center
2016-06-01	N. pygmaeus	1	Yunnan	Incorrect	Residential area	1 Subhealthy	Unknown	Unknown	Release	Wild
2016-09-01	N. pygmaeus	1	Guangxi	Incorrect	Residential area	1 Subhealthy	Primates	Unknown	Rescue	Unknown
2016-09-01	N. pygmaeus	1	Hainan	Incorrect	Residential area	1 Subhealthy	Primates	Unknown	Unknown	Unknown
2016-11-01	N. pygmaeus	1	Yunnan	Incorrect	Residential area	1 Injured	Unknown	Unknown	Rescue	Unknown
2017-05-01	N. pygmaeus	1	Guangdong	Incorrect	Residential area	1 Subhealthy	Species	Trade	Rescue	Unknown
2017-05-01	N. pygmaeus	1	Yunnan	Correct	Vehicle	1 Subhealthy	Primates	Trade	Rescue	Wildlife rescue center
2017-06-01	N. pygmaeus	2	Yunnan	Incorrect	Market	2 Injured	Primates	Trade	Rescue	Unknown
2017-09-01	N. pygmaeus	1	Anhui	Incorrect	Residential area	1 Subhealthy	Unknown	Unknown	Rescue	Zoo
2017-09-01	N. pygmaeus	1	Anhui	Incorrect	Residential area	1 Healthy	Unknown	Unknown	Rescue	Zoo
2017-09-01	N. pygmaeus	1	Liaoning	Incorrect	Residential area	1 Healthy	Primates	Unknown	Rescue	Unknown
2000-04-01	Nycticebus bengalensis	1	Guangdong	Correct	Residential area	1 Healthy	Primates	Trade	Private captivity	Unknown
2001-03-01	Nycticebus bengalensis	2	Guizhou	Correct	Vehicle	2 Healthy	Primates	Trade	Unknown	Zoo
2002-05-01	Nycticebus bengalensis	1	Guangdong	Correct	Residential area	1 Healthy	Unknown	Unknown	Unknown	Wild
2002-05-01	Nycticebus bengalensis	1	Guangdong	Correct	Residential area	1 Healthy	Primates	Trade	Unknown	Wildlife rescue center
2002-09-01	Nycticebus bengalensis	1	Guangdong	Correct	Residential area	1 Healthy	Unknown	Unknown	Unknown	Zoo
2002-09-01	Nycticebus bengalensis	1	Shanghai	Correct	Residential area	1 Healthy	Unknown	Unknown	Rescue	Zoo
2002-09-01	Nycticebus bengalensis	2	Sichuan	Correct	Residential area	2 Subhealthy	Primates	pet	Rescue	Unknown
2003-01-01	Nycticebus bengalensis	1	Yunnan	Correct	Field	1 Healthy	Unknown	Distribution area	Unknown	Wild
2003-04-01	Nycticebus bengalensis	6	Yunnan	Correct	Residential area	6 Subhealthy	Unknown	Trade	Unknown	Unknown
2003-12-01	Nycticebus bengalensis	2	Yunnan	Correct	Residential area	2 Subhealthy	Species	Trade	Rescue	Wildlife rescue center
2004-01-01	Nycticebus bengalensis	1	Jiangxi	Correct	Field	1 Healthy	Species	Unknown	Rescue	Unknown
2004-04-01	Nycticebus bengalensis	1	Beijing	Correct	Field	1 Healthy	Species	Unknown	Rescue	Unknown
2004-06-01	Nycticebus bengalensis	1	Liaoning	Correct	Residential area	1 Subhealthy	Primates	Trade	Rescue	Unknown
2005-02-01	Nycticebus bengalensis	1	Yunnan	Correct	Field	1 Healthy	Species	Distribution area	Unknown	Wild
2005-05-01	Nycticebus bengalensis	4	Guangxi	Correct	Field	4 Healthy	Species	Unknown	Rescue	Wild
2005-06-01	Nycticebus bengalensis	1	Guangxi	Correct	Residential area	1 Subhealthy	Unknown	Trade	Unknown	Zoo
2005-06-01	Nycticebus bengalensis	1	Tibetan	Correct	Field	1 Injured	Unknown	Unknown	Rescue	Wild
2005-06-01	Nycticebus bengalensis	1	Zhejiang	Correct	Residential area	1 Subhealthy	Unknown	Unknown	Private captivity	Wildlife rescue center
2005-07-01	Nycticebus bengalensis	1	Guangdong	Correct	Residential area	1 Subhealthy	Primates	Unknown	Rescue	Zoo
2006-01-01	Nycticebus bengalensis	1	Yunnan	Correct	Field	1 Dead	Unknown	Unknown	Unknown	Wildlife rescue center
2006-04-01	Nycticebus bengalensis	8	Guangxi	Correct	Vehicle	8 Subhealthy	Species	Trade	Rescue	Unknown
2006-06-01	Nycticebus bengalensis	1	Yunnan	Correct	Residential area	1 Subhealthy	Unknown	Trade	Rescue	Unknown
2006-06-01	Nycticebus bengalensis	2	Yunnan	Correct	Market	2 Subhealthy	Species	Trade	Rescue	Wildlife rescue center
2006-11-01	Nycticebus bengalensis	1	Yunnan	Correct	Vehicle	1 Subhealthy	Unknown	Trade	Unknown	Unknown
2006-12-01	Nycticebus bengalensis	1	Guangdong	Correct	Field	1 Healthy	Primates	pet	Rescue	Wildlife rescue center
2006-12-01	Nycticebus bengalensis	5	Hunan	Correct	Vehicle	5 Subhealthy	Unknown	Trade	Unknown	Unknown
2007-03-01	Nycticebus bengalensis	1	Guangxi	Correct	Residential area	1 Dead	Unknown	pet	Rescue	Wildlife rescue center
2007-03-01	Nycticebus bengalensis	1	Guangxi	Correct	Residential area	1 Subhealthy	Species	Unknown	Rescue	Wildlife rescue center
2007-03-01	Nycticebus bengalensis	2	Yunnan	Correct	Residential area	2 Subhealthy	Unknown	Trade	Unknown	Unknown
2007-04-01	Nycticebus bengalensis	1	Chongqing	Correct	Vehicle	1 Subhealthy	Unknown	pet	Rescue	Zoo
2007-06-01	Nycticebus bengalensis	1	Anhui	Correct	Vehicle	1 Healthy	Species	Trade	Unknown	Unknown
2007-06-01	Nycticebus bengalensis	1	Guangxi	Correct	Field	1 Injured	Unknown	pet	Rescue	Unknown
2007-06-01	Nycticebus bengalensis	1	Hubei	Correct	Residential area	1 Subhealthy	Primates	Unknown	Unknown	Wildlife rescue center
2007-07-01	Nycticebus bengalensis	1	Guangdong	Correct	Residential area	1亚将康	Species	Unknown	Unknown	Zoo
2007-07-01	Nycticebus bengalensis	1	Guangdong	Correct	Residential area	1 Subhealthy	Species	Trade	Unknown	Wildlife rescue center
2007-07-01	Nycticebus bengalensis	26	Guangxi	Correct	Vehicle	26 Injured	Species	Trade	Rescue	Unknown
2007-07-01	Nycticebus bengalensis	1	Guizhou	Correct	Residential area	1 Subhealthy	Species	Trade	Rescue	Wildlife rescue center
2007-07-01	Nycticebus bengalensis	1	Yunnan	Correct	Field	1 Injured	Primates	Trade	Unknown	Zoo
2007-07-01	Nycticebus bengalensis	6	Yunnan	Correct	Field	6 Healthy	Species	Unknown	Unknown	Wild
2007-09-01	Nycticebus bengalensis	1	Liaoning	Correct	Residential area	1 Subhealthy	Unknown	Trade	Private captivity	Wildlife rescue center
2007-09-01	Nycticebus bengalensis	2	Yunnan	Correct	Market	2 Healthy	Species	Trade	Unknown	Zoo
2007-11-01	Nycticebus bengalensis	1	Guangdong	Correct	Residential area	1 Healthy	Unknown	Trade	Unknown	Wildlife rescue center
2007-11-01	Nycticebus bengalensis	2	Jilin	Correct	Market	2 Subhealthy	Species	Trade	Rescue	Unknown
2007-12-01	Nycticebus bengalensis	1	Sichuan	Correct	Vehicle	1 Subhealthy	Unknown	Trade	Rescue	Zoo
2007-12-01	Nycticebus bengalensis	1	Yunnan	Correct	Field	1 Subhealthy	Unknown	pet	Unknown	Wildlife rescue center
2008-03-01	Nycticebus bengalensis	1	Guangxi	Correct	Residential area	1 Subhealthy	Species	Unknown	Unknown	Unknown
2008-03-01	Nycticebus bengalensis	1	Sichuan	Correct	Residential area	1 Subhealthy	Unknown	Unknown	Release	Wild
2008-04-01	Nycticebus bengalensis	1	Zhejiang	Correct	Residential area	1 Subhealthy	Primates	Trade	Rescue	Wildlife rescue center
2008-06-01	Nycticebus bengalensis	1	Guizhou	Correct	Residential area	1 Subhealthy	Species	Trade	Release	Wildlife rescue center
2008-07-01	Nycticebus bengalensis	1	Yunnan	Correct	Market	1 Subhealthy	Species	Trade	Release	Wild
2008-08-01	Nycticebus bengalensis	1	Yunnan	Correct	Field	1 Injured	Species	Unknown	Release	Wild
2009-02-01	Nycticebus bengalensis	2	Yunnan	Correct	Market	2 Subhealthy	Unknown	Trade	Release	Wild
2009-04-01	Nycticebus bengalensis	1	Guangdong	Correct	Market	1 Subhealthy	Species	Trade	Unknown	Unknown
2009-05-01	Nycticebus bengalensis	1	Shanghai	Correct	Residential area	1 Subhealthy	Primates	pet	Unknown	Unknown
2009-05-01	Nycticebus bengalensis	1	Yunnan	Correct	Residential area	1 Subhealthy	Unknown	Unknown	Release	Wild
2009-07-01	Nycticebus bengalensis	2	Henan	Correct	Residential area	2 Subhealthy	Unknown	pet	Rescue	Zoo
2009-10-01	Nycticebus bengalensis	1	Guangdong	Correct	Residential area	1 Subhealthy	Species	pet	Rescue	Unknown
2009-10-01	Nycticebus bengalensis	1	Yunnan	Correct	Residential area	1 Subhealthy	Unknown	Unknown	Rescue	Wildlife rescue center
2009-11-01	Nycticebus bengalensis	1	Guangdong	Correct	Residential area	1 Subhealthy	Unknown	Unknown	Unknown	Unknown
2009-11-01	Nycticebus bengalensis	2	Guangdong	Correct	Residential area	2 Subhealthy	Unknown	Trade	Rescue	Wildlife rescue center
2009-12-01	Nycticebus bengalensis	7	Guangxi	Correct	Vehicle	7 Subhealthy	Species	Unknown	Unknown	Unknown
2010-01-01	Nycticebus bengalensis	1	Yunnan	Correct	Residential area	1 Subhealthy	Species	Unknown	Release	Wild
2010-02-01	Nycticebus bengalensis	8	Guangdong	Correct	Vehicle	8 Subhealthy	Species	Trade	Unknown	Unknown
2010-03-01	Nycticebus bengalensis	2	Hubei	Correct	Market	2 Subhealthy	Unknown	Trade	Rescue	Wildlife rescue center
2010-03-01	Nycticebus bengalensis	1	Zhejiang	Correct	Residential area	1 Healthy	Primates	Unknown	Rescue	Zoo
2010-05-01	Nycticebus bengalensis	1	Guangdong	Correct	Market	1 Healthy	Unknown	Unknown	Rescue	Wildlife rescue center
2010-05-01	Nycticebus bengalensis	1	Guangdong	Correct	Residential area	1 Subhealthy	Primates	Unknown	Unknown	Unknown
2010-05-01	Nycticebus bengalensis	1	Yunnan	Correct	Field	1 Injured	Species	Unknown	Release	Wild
2010-06-01	Nycticebus bengalensis	1	Guangdong	Correct	Residential area	1 Subhealthy	Unknown	Trade	Rescue	Wildlife rescue center
2010-06-01	Nycticebus bengalensis	1	Yunnan	Correct	Field	1 Injured	Unknown	Unknown	Rescue	Unknown
2010-06-01	Nycticebus bengalensis	1	Yunnan	Correct	Field	1 Healthy	Species	Distribution area	Release	Wild
2010-07-01	Nycticebus bengalensis	1	Shan'xi	Correct	Residential area	1 Healthy	Primates	Unknown	Unknown	Unknown
2010-07-01	Nycticebus bengalensis	1	Yunnan	Correct	Vehicle	1 Healthy	Species	Trade	Release	Wild
2010-07-01	Nycticebus bengalensis	1	Zhejiang	Correct	Market	1 Healthy	Species	Trade	Unknown	Unknown
2010-08-01	Nycticebus bengalensis	1	Yunnan	Correct	Residential area	1 Healthy	Primates	Unknown	Unknown	Wild
2010-10-01	Nycticebus bengalensis	7	Henan	Correct	Market	6 Subhealthy，5 Dead	Primates	Trade	Rescue	Wild
2011-03-01	Nycticebus bengalensis	1	Chongqing	Correct	Residential area	1 Healthy	Unknown	pet	Rescue	Zoo
2011-04-01	Nycticebus bengalensis	1	Yunnan	Correct	Residential area	1 Healthy	Unknown	pet	Release	Wild
2011-04-01	Nycticebus bengalensis	1	Yunnan	Correct	Residential area	1 Healthy	Unknown	pet	Release	Wild
2011-06-01	Nycticebus bengalensis	1	Chongqing	Correct	Residential area	1 Subhealthy	Unknown	pet	Rescue	Unknown
2011-08-01	Nycticebus bengalensis	1	Yunnan	Correct	Market	1 Subhealthy	Unknown	Trade	Rescue	Unknown
2011-10-01	Nycticebus bengalensis	1	Hebei	Correct	Residential area	1 Healthy	Species	Trade	Rescue	Zoo
2011-10-01	Nycticebus bengalensis	1	Jiangsu	Correct	Field	1 Subhealthy	Primates	pet	Rescue	Zoo
2011-10-01	Nycticebus bengalensis	1	Yunnan	Correct	Field	1 Healthy	Species	Distribution area	Rescue	Unknown
2011-11-01	Nycticebus bengalensis	4	Shan'xi	Correct	Residential area	4 Healthy	Species	Trade	Rescue	Zoo
2011-12-01	Nycticebus bengalensis	1	Guangxi	Correct	Market	1 Subhealthy	Unknown	Trade	Rescue	Wildlife rescue center
2011-12-01	Nycticebus bengalensis	1	Henan	Correct	Residential area	1 Injured	Species	Trade	Rescue	Zoo
2012-04-01	Nycticebus bengalensis	1	Beijing	Correct	Market	1 Subhealthy	Species	Trade	Rescue	Zoo
2012-05-01	Nycticebus bengalensis	1	Guangxi	Correct	Field	1 Injured	Species	Unknown	Rescue	Zoo
2012-05-01	Nycticebus bengalensis	2	Yunnan	Correct	Field	2 Subhealthy	Species	Trade	Rescue	Wild
2012-05-01	Nycticebus bengalensis	1	Yunnan	Correct	Field	1 Subhealthy	Species	Unknown	Release	Wild
2012-06-01	Nycticebus bengalensis	1	Liaoning	Correct	Residential area	1 Subhealthy	Unknown	Trade	Rescue	Wildlife rescue center
2012-06-01	Nycticebus bengalensis	1	Tianjin	Correct	Residential area	1 Healthy	Primates	Trade	Rescue	Wildlife rescue center
2012-06-01	Nycticebus bengalensis	1	Yunnan	Correct	Market	1 Subhealthy	Species	Trade	Release	Wild
2012-06-01	Nycticebus bengalensis	1	Zhejiang	Correct	Residential area	1 Healthy	Primates	Unknown	Rescue	Unknown
2012-08-01	Nycticebus bengalensis	1	Guangdong	Correct	Residential area	1 Healthy	Species	Trade	Rescue	Unknown
2012-09-01	Nycticebus bengalensis	1	Guangdong	Correct	Residential area	1 Injured	Unknown	Unknown	Rescue	Wildlife rescue center
2012-09-01	Nycticebus bengalensis	1	Yunnan	Correct	Residential area	1 Subhealthy	Species	Unknown	Unknown	Unknown
2012-12-01	Nycticebus bengalensis	1	Fujian	Correct	Residential area	1 Subhealthy	Species	pet	Unknown	Zoo
2013-02-01	Nycticebus bengalensis	2	Yunnan	Correct	Vehicle	2 Subhealthy	Species	Trade	Rescue	Wild
2013-04-01	Nycticebus bengalensis	1	Yunnan	Correct	Residential area	1 Healthy	Unknown	pet	Rescue	Wild
2013-05-01	Nycticebus bengalensis	2	Yunnan	Correct	Market	1 Healthy，1 Subhealthy	Species	Trade	Rescue	Wild
2013-05-01	Nycticebus bengalensis	1	Yunnan	Correct	Residential area	1 Injured	Species	Unknown	Unknown	Wild
2013-05-01	Nycticebus bengalensis	4	Yunnan	Correct	Residential area	4 Subhealthy	Unknown	Unknown	Unknown	Wild
2013-07-01	Nycticebus bengalensis	2	Yunnan	Correct	Vehicle	2 Subhealthy	Species	Unknown	Unknown	Unknown
2013-07-01	Nycticebus bengalensis	1	Chongqing	Correct	Residential area	1 Subhealthy	Primates	Trade	Rescue	Unknown
2013-08-01	Nycticebus bengalensis	1	Guangdong	Correct	Residential area	1 Healthy	Unknown	Unknown	Release	Zoo
2013-09-01	Nycticebus bengalensis	1	Guangxi	Correct	Residential area	1 Subhealthy	Primates	Unknown	Rescue	Wildlife rescue center
2013-09-01	Nycticebus bengalensis	1	Jiangsu	Correct	Market	1 Subhealthy	Species	Trade	Rescue	Zoo
2013-09-01	Nycticebus bengalensis	1	Yunnan	Correct	Residential area	1 Healthy	Unknown	Unknown	Release	Unknown
2013-10-01	Nycticebus bengalensis	1	Guangxi	Correct	Residential area	1 Injured	Unknown	Unknown	Rescue	Unknown
2014-01-01	Nycticebus bengalensis	1	Zhejiang	Correct	Market	1 Subhealthy	Primates	Trade	Rescue	Wildlife rescue center
2014-02-01	Nycticebus bengalensis	2	Yunnan	Correct	Residential area	2 Subhealthy	Unknown	Trade	Rescue	Wild
2014-03-01	Nycticebus bengalensis	1	Guizhou	Correct	Field	1 Healthy	Primates	Unknown	Rescue	Zoo
2014-03-01	Nycticebus bengalensis	3	Yunnan	Correct	Field	3 Healthy	Species	Unknown	Rescue	Wild
2014-04-01	Nycticebus bengalensis	1	Guangdong	Correct	Market	1 Subhealthy	Species	Trade	Rescue	Wildlife rescue center
2014-04-01	Nycticebus bengalensis	1	Yunnan	Correct	Field	1 Healthy	Unknown	Unknown	Unknown	Unknown
2014-04-01	Nycticebus bengalensis	1	Yunnan	Correct	Residential area	1 Healthy	Species	Trade	Rescue	Wild
2014-06-01	Nycticebus bengalensis	10	Guangxi	Correct	Vehicle	10 Subhealthy	Species	Unknown	Rescue	Unknown
2014-06-01	Nycticebus bengalensis	1	Zhejiang	Correct	Residential area	1 Subhealthy	Species	Unknown	Rescue	Zoo
2014-07-01	Nycticebus bengalensis	1	Jilin	Correct	Residential area	1 Subhealthy	Primates	Unknown	Rescue	Wildlife rescue center
2014-07-01	Nycticebus bengalensis	1	Jiangsu	Correct	Residential area	1 Injured	Unknown	Unknown	Rescue	Wildlife rescue center
2014-07-01	Nycticebus bengalensis	1	Jiangsu	Correct	Residential area	1 Healthy	Unknown	Unknown	Rescue	Zoo
2014-07-01	Nycticebus bengalensis	2	Yunnan	Correct	Vehicle	2 Healthy	Unknown	Trade	Rescue	Wild
2014-07-01	Nycticebus bengalensis	1	Yunnan	Correct	Residential area	1 Subhealthy	Unknown	Trade	Rescue	Unknown
2014-08-01	Nycticebus bengalensis	1	Guizhou	Correct	Residential area	1 Subhealthy	Species	pet	Rescue	Zoo
2014-08-01	Nycticebus bengalensis	1	Shan'xi	Correct	Residential area	1 Subhealthy	Primates	Trade	Rescue	Zoo
2014-09-01	Nycticebus bengalensis	1	Yunnan	Correct	Field	1 Subhealthy	Unknown	Distribution area	Release	Wild
2014-09-01	Nycticebus bengalensis	2	Yunnan	Correct	Market	2 Healthy	Unknown	Trade	Rescue	Unknown
2014-10-01	Nycticebus bengalensis	1	Sichuan	Correct	Residential area	1 Subhealthy	Species	pet	Rescue	Wildlife rescue center
2014-10-01	Nycticebus bengalensis	1	Yunnan	Correct	Market	1 Healthy	Species	Trade	Rescue	Unknown
2014-11-01	Nycticebus bengalensis	1	Yunnan	Correct	Residential area	1 Subhealthy	Species	Trade	Rescue	Unknown
2014-11-01	Nycticebus bengalensis	1	Yunnan	Correct	Residential area	1 Healthy	Species	Unknown	Rescue	Zoo
2014-12-01	Nycticebus bengalensis	28	Guangxi	Correct	Vehicle	28 Subhealthy	Species	Unknown	Rescue	Unknown
2015-01-01	Nycticebus bengalensis	1	Yunnan	Correct	Residential area	1 Dead	Species	Unknown	Unknown	Wildlife rescue center
2015-03-01	Nycticebus bengalensis	1	Henan	Correct	Residential area	1 Subhealthy	Unknown	Unknown	Rescue	Wildlife rescue center
2015-03-01	Nycticebus bengalensis	1	Yunnan	Correct	Residential area	1 Subhealthy	Unknown	Unknown	Unknown	Unknown
2015-04-01	Nycticebus bengalensis	1	Yunnan	Correct	Field	1 Subhealthy	Species	Unknown	Unknown	Wildlife rescue center
2015-04-01	Nycticebus bengalensis	1	Yunnan	Correct	Field	1 Healthy	Species	Unknown	Release	Wild
2015-04-01	Nycticebus bengalensis	1	Yunnan	Correct	Residential area	1 Healthy	Unknown	Unknown	Release	Wild
2015-05-01	Nycticebus bengalensis	1	Anhui	Correct	Residential area	1 Subhealthy	Species	Unknown	Rescue	Zoo
2015-06-01	Nycticebus bengalensis	1	Anhui	Correct	Vehicle	1 Subhealthy	Primates	Unknown	Rescue	Zoo
2015-06-01	Nycticebus bengalensis	1	Tianjin	Correct	Residential area	1 Subhealthy	Primates	Trade	Rescue	Unknown
2015-08-01	Nycticebus bengalensis	2	Liaoning	Correct	Residential area	2 Subhealthy	Primates	Unknown	Unknown	Wildlife rescue center
2015-08-01	Nycticebus bengalensis	1	Yunnan	Correct	Field	1 Subhealthy	Species	Unknown	Unknown	Unknown
2015-09-01	Nycticebus bengalensis	4	Guangxi	Correct	Field	4 Healthy	Species	Unknown	Release	Wild
2015-09-01	Nycticebus bengalensis	2	Shandong	Correct	Market	2 Subhealthy	Species	Trade	Rescue	Zoo
2015-09-01	Nycticebus bengalensis	1	Yunnan	Correct	Residential area	1 Healthy	Unknown	pet	Release	Wild
2015-10-01	Nycticebus bengalensis	1	Hebei	Correct	Residential area	1 Injured	Unknown	Unknown	Rescue	Wildlife rescue center
2015-12-01	Nycticebus bengalensis	1	Yunnan	Correct	Vehicle	1 Subhealthy	Unknown	Trade	Rescue	Unknown
2016-01-01	Nycticebus bengalensis	8	Guangxi	Correct	Vehicle	8 Subhealthy	Species	Trade	Rescue	Unknown
2016-01-01	Nycticebus bengalensis	3	Yunnan	Correct	Vehicle	3 Subhealthy	Species	Trade	Rescue	Unknown
2016-01-01	Nycticebus bengalensis	1	Yunnan	Correct	Market	1 Subhealthy	Primates	Trade	Release	Wild
2016-01-01	Nycticebus bengalensis	1	Yunnan	Correct	Residential area	1 Subhealthy	Primates	Unknown	Rescue	Unknown
2016-04-01	Nycticebus bengalensis	1	Yunnan	Correct	Residential area	1 Injured	Unknown	Unknown	Rescue	Wildlife rescue center
2016-05-01	Nycticebus bengalensis	1	Guangxi	Correct	Residential area	1 Subhealthy	Unknown	Unknown	Unknown	Unknown
2016-05-01	Nycticebus bengalensis	2	Yunnan	Correct	Field	2 Injured	Primates	Unknown	Unknown	Wild
2016-05-01	Nycticebus bengalensis	1	Yunnan	Correct	Residential area	1 Injured	Unknown	Unknown	Rescue	Wildlife rescue center
2016-05-01	Nycticebus bengalensis	1	Yunnan	Correct	Residential area	1 Healthy	Unknown	Unknown	Rescue	Wildlife rescue center
2016-07-01	Nycticebus bengalensis	1	Hubei	Correct	Residential area	1 Subhealthy	Primates	Unknown	Rescue	Wild
2016-08-01	Nycticebus bengalensis	2	Beijing	Correct	Residential area	2 Subhealthy	Unknown	pet	Rescue	Wild
2016-08-01	Nycticebus bengalensis	1	Fujian	Correct	Residential area	1 Injured	Primates	Unknown	Rescue	Wild
2016-08-01	Nycticebus bengalensis	1	Hunan	Correct	Residential area	1 Healthy	Primates	Unknown	Rescue	Wild
2016-08-01	Nycticebus bengalensis	1	Shanghai	Correct	Residential area	1 Subhealthy	Primates	Unknown	Rescue	Zoo
2016-08-01	Nycticebus bengalensis	2	Yunnan	Correct	Vehicle	2 Subhealthy	Primates	Trade	Rescue	Unknown
2016-09-01	Nycticebus bengalensis	1	Yunnan	Correct	Residential area	1 Subhealthy	Unknown	pet	Rescue	Unknown
2016-11-01	Nycticebus bengalensis	3	Yunnan	Correct	Vehicle	1 Subhealthy、2 Healthy	Unknown	Trade	Rescue	Zoo
2017-02-01	Nycticebus bengalensis	1		Correct	Residential area	1 Subhealthy	Primates	Distribution area	Rescue	Unknown
2017-02-01	Nycticebus bengalensis	1	Yunnan	Correct	Residential area	1 Subhealthy	Primates	pet	Rescue	Unknown
2017-02-01	Nycticebus bengalensis	1	Yunnan	Correct	Field	1 Injured	Primates	Distribution area	Unknown	Unknown
2017-03-01	Nycticebus bengalensis	3	Yunnan	Correct	Field	3 Subhealthy	Species	Trade	Rescue	Unknown
2017-04-01	Nycticebus bengalensis	1	Anhui	Correct	Residential area	1 Subhealthy	Primates	Unknown	Rescue	Wild
2017-04-01	Nycticebus bengalensis	1	Beijing	Correct	Residential area	1 Subhealthy	Species	Trade	Rescue	Wild
2017-04-01	Nycticebus bengalensis	1	Yunnan	Correct	Residential area	1 Subhealthy	Unknown	Unknown	Rescue	Wildlife rescue center
2017-05-01	Nycticebus bengalensis	1	Beijing	Correct	Residential area	1 Subhealthy	Primates	Trade	Rescue	Zoo
2017-05-01	Nycticebus bengalensis	1	Guangxi	Correct	Residential area	1 Injured	Unknown	Trade	Unknown	Unknown
2017-05-01	Nycticebus bengalensis	1	Yunnan	Correct	Vehicle	1 Subhealthy	Primates	Trade	Rescue	Wildlife rescue center
2017-05-01	Nycticebus bengalensis	1	Yunnan	Correct	Residential area	1 Subhealthy	Unknown	Unknown	Rescue	Wildlife rescue center
2005-04-01	R. bieti	1	Yunnan		Field	1 Injured	Species	Distribution area	Rescue	Wild
2015-05-01	R. bieti	1	Yunnan		Residential area	1 Injured	Primates	Distribution area	Rescue	Wildlife rescue center
2005-04-01	Rhinopithecus roxellana	1	Sichuan		Residential area	1 Healthy	Primates	Unknown	Rescue	Zoo
2006-12-01	Rhinopithecus roxellana	1	Shan'xi		Field	1 Healthy，3 Dead	Primates	Distribution area	Release	Wildlife rescue center
2010-12-01	Rhinopithecus roxellana	1	Shan'xi		Residential area	1 Healthy	Primates	Unknown	Rescue	Wild
2012-10-01	Rhinopithecus roxellana	1	Sichuan		Field	1 Injured	Species	Distribution area	Rescue	Zoo
2014-03-01	Rhinopithecus roxellana	1	Shan'xi		Residential area	1 Injured	Primates	Unknown	Rescue	Wild
2014-07-01	Rhinopithecus roxellana	1	Shan'xi		Field	1 Injured	Primates	Distribution area	Rescue	Wild
2014-11-01	Rhinopithecus roxellana	3	Henan		Vehicle	1 Dead，2 Subhealthy	Primates	Trade	Rescue	Zoo
2016-03-01	Semnopithecus schistaceus	2	Guangxi		Vehicle	Dead	Primates			Unknown
2001-01-01	T. francoisi	1	Chongqing		Field	1 Injured	Primates	Distribution area	Rescue	Wildlife rescue center
2007-05-01	T. francoisi	1	Chongqing		Market	1 Dead	Primates	Trade	Rescue	Unknown
2011-09-01	T. francoisi	1	Chongqing		Residential area	1 Healthy	Primates	Distribution area	Release	Wildlife rescue center
2014-05-01	T. francoisi	14	Guangxi		Vehicle	14 Dead	Primates	Distribution area	Rescue	Unknown
